# Supplementary material for: Efficacy of Autologous Intrauterine Infusion of Platelet-Rich Plasma in Patients with Unexplained Repeated Implantation Failures in Embryo Transfer: A Systematic Review and Meta-Analysis
Source: MDPI journal article supplement (doi:10.3390/jcm11226753), 2022-11-15

Figure S1: (a) Risk of bias graph and (b) risk of bias summary

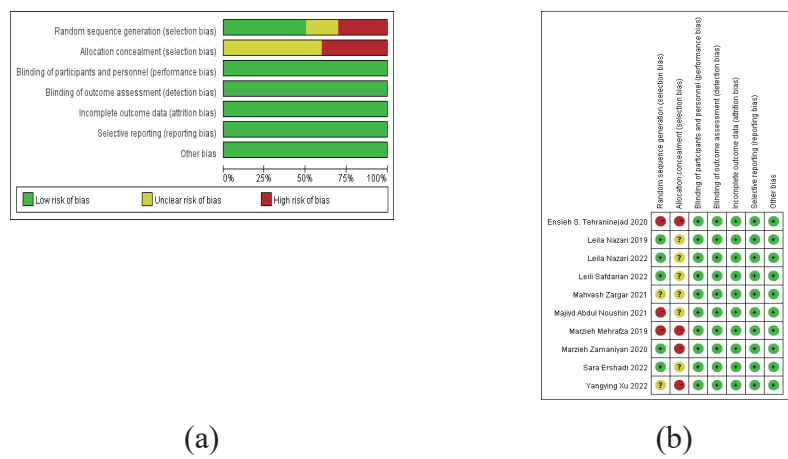

Figure S2: Funnel plot of meta-analysis of 10 included studies.

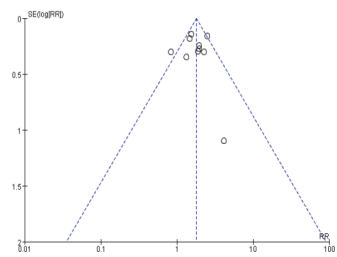

Figure S3: Funnel plot of meta-analysis of 10 included studies excluding PRP dosage.

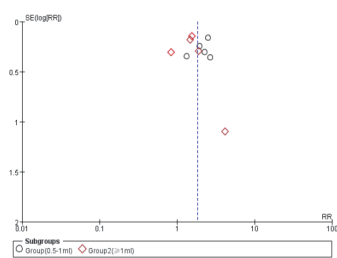

Figure S4: Funnel plot of meta-analysis of 10 included studies excluding study design.

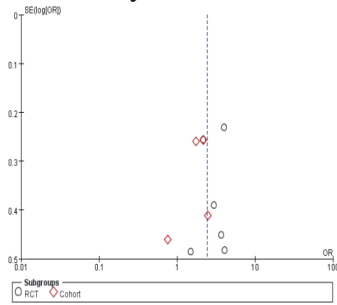

Figure S5: Forest plot of RR, 95% CI, and heterogeneity in studies that evaluated the risk of live birth rates in interventions versus controls

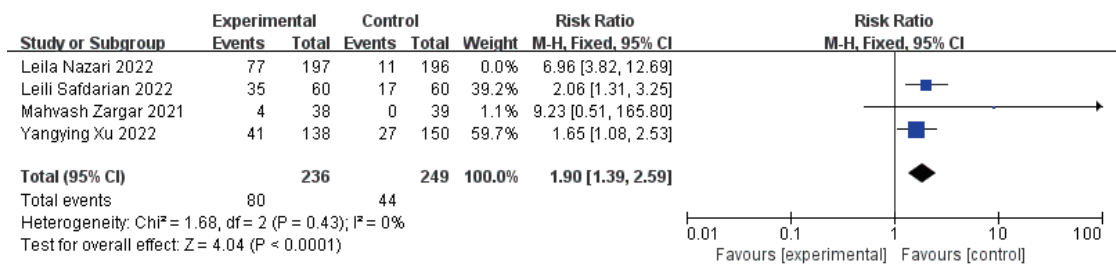

Supplement: s1 [file s1]
