# Supplementary material for: Efficacy of Autologous Intrauterine Infusion of Platelet-Rich Plasma in Patients with Unexplained Repeated Implantation Failures in Embryo Transfer: A Systematic Review and Meta-Analysis
Source: MDPI journal article supplement (doi:10.3390/jcm11226753), 2022-11-15
Supplement: s1 [file s1]

| Sample size |      | Intervention(s)                           | Control                                                                   | Time of PRP infusion                                                       |
|-------------|------|-------------------------------------------|---------------------------------------------------------------------------|----------------------------------------------------------------------------|
| Control     | Case |                                           |                                                                           |                                                                            |
| 150         | 138  | Intrauterine infusion of 1 ml PRP         | Underwent ET without intrauterine infusion of PRP                         | 48–72 hours before ET                                                      |
| 60          | 60   | Intrauterine infusion of 0.5 ml PRP       | Underwent ET without intrauterine infusion of PRP                         | 48 hours before ET                                                         |
| 196         | 197  | Intrauterine infusion of 0.5 ml PRP       | Underwent ET without intrauterine infusion of PRP                         | 48 hours before ET                                                         |
| 39          | 38   | Intrauterine infusion of 1.5 ml PRP       | Underwent ET without intrauterine infusion of PRP                         | 48 hours before ET                                                         |
| 43          | 55   | Intrauterine infusion of 0.5 ml PRP       | Underwent ET without intrauterine infusion of PRP                         | 48 hours before ET                                                         |
| 43          | 42   | Intrauterine infusion of 1 ml PRP         | Underwent ET without intrauterine infusion of PRP                         | 2 days before ET                                                           |
| 154         | 109  | treatment with PRP intrauterine PRP(1 ml) | Underwent ET without intrauterine infusion of PRP                         | Intrauterine PRP during the index frozen embryo transfer preparation cycle |
| 48          | 49   | Intrauterine infusion of 0.5 ml PRP       | Underwent ET without intrauterine infusion of PRP                         | 48 hours before ET                                                         |
| 45          | 40   | Intrauterine infusion of 0.5 ml PRP       | Underwent ET without intrauterine infusion of PRP                         | 48 hours before ET                                                         |
| 56          | 67   | Intrauterine infusion of 1 ml lympho-PRP  | A single administration of 300ug recombinant GCSF and two hours before ET | 2 days before ET                                                           |

| Population                                                                                                                                                                                                                                                                                                | Exclusion criteria                                                                                                                                                                                                                                                                                                                                                                                                                                                                                                            |
|-----------------------------------------------------------------------------------------------------------------------------------------------------------------------------------------------------------------------------------------------------------------------------------------------------------|-------------------------------------------------------------------------------------------------------------------------------------------------------------------------------------------------------------------------------------------------------------------------------------------------------------------------------------------------------------------------------------------------------------------------------------------------------------------------------------------------------------------------------|
| Patients aged 23 to 40 years who had three or more consecutive failed embryo implantations with good-quality embryos(at least 6 cleavage-stage embryos or three blastocysts)                                                                                                                              | Abnormal karyotype from either partner, uterine defects evidence, ultrasonographic evidence of hydrosalpinx, infections, endocrine problems, coagulation defects or autoimmune defects                                                                                                                                                                                                                                                                                                                                        |
| Patients aged 23 to 40 years who failed to conceive after three or more ET with high-quality embryos and had at least one frozen good-quality blastocyst-stage embryo                                                                                                                                     | Chromosomal and genetic disorders, hematological and immunological disorders, hormonal disorders, uterine abnormality(congenital or acquired), body mass index above 30 kg/m <sup>2</sup> , severe endometriosis, and patients with cancellation history of the previous ET due to a thin endometrium(≤7 mm) in hormone                                                                                                                                                                                                       |
| Patients aged 18 to 38 years who failed to achieve pregnancy after three or more embryo transfers with high-quality embryos                                                                                                                                                                               | Immunological abnormalities, inflammatory conditions, hormonal or anatomical disorders, PCOS, OHSS, endometriosis, presence of space-occupying lesions, history of miscarriage or ectopic pregnancy, myomas, polyps, adhesions, previous pelvic surgeries, failed fertilization, and less than two embryos available for transfer; participants with a severe male factor of their spouses and chromosomal abnormalities                                                                                                      |
| Patients below 41 years with at least two IVF failures                                                                                                                                                                                                                                                    | Chromosomal, genetic, and uterine abnormalities, hematological or immunological disorders, hormonal disorders, and embryos that arise from such maternal and paternal abnormalities                                                                                                                                                                                                                                                                                                                                           |
| Patients between 20–40 years who failed to be pregnant after three or more good quality embryo transfer of embryos with good quality                                                                                                                                                                      | Hematologic disorders, immunologic disorders, hormonal disorders, chromosomal and genetic anomalies, and renal failure                                                                                                                                                                                                                                                                                                                                                                                                        |
| Patients below 35 years who failed to transfer at least four good-quality embryos in at least three fresh or frozen cycles                                                                                                                                                                                | Age ≥35 years, endometrial thickness <7 mm, basal follicle-stimulating hormone levels >10 mIU/mL, severe male factors such as azoospermia, intrauterine disorders, thrombophilia, thyroid dysfunction, positive antiphospholipid antibodies or chromosomal abnormality in a couple                                                                                                                                                                                                                                            |
| Patients aged below 40 years with a history of RIF(failed to achieve a clinical pregnancy after ≥3 ET cycles with at least a total of four good quality cleavage/blastocyst-stage embryos derived from autologous gametes transferred in endometrium of ≥8mm thickness) undergoing frozen embryo transfer | BMI≥30 kg/m <sup>2</sup> , congenital and untreated acquired uterine abnormalities, untreated hydrosalpinges, poor ovarian responder as per the Bologna criteria, thrombophilia, or uncontrolled endocrine or hematologic dysfunction; those undergoing preimplantation genetic testing cycles; and those who had thin endometrium(<8 mm) in the index frozen embryo transfer cycle, severe male factor infertility, difficult ET, only poor-quality embryos available, and couple with genetic and chromosomal abnormalities |
| Patients aged below 40 years with a history of RIF who failed to conceive after 3 or more embryo transfers with high-quality embryos and candidates for frozen embryo transfer                                                                                                                            | Uterine abnormalities, hormonal disorders, immunological and haematological disorders, azoospermia, testicular sperm extraction or aspiration, anatomical disorders of the male genital tract, varicocele and chromosomal abnormalities in the couples                                                                                                                                                                                                                                                                        |
| Patients aged below 40 years with a history of a history of two to three IVF failures                                                                                                                                                                                                                     | Any uterine anomalies, an underlying disease, taking any specific medication, no proper frozen embryo transfer for transfer on the day of ET, insufficient endometrial thickness for ET, and reluctance toward participation                                                                                                                                                                                                                                                                                                  |
| Patients aged 18-40 years with a history of more than 2 repeated failed ET                                                                                                                                                                                                                                | Not mentioned                                                                                                                                                                                                                                                                                                                                                                                                                                                                                                                 |

Table S1. Characteristics of the included studies

| Study(Author name & Publication) |      | Country | Study design |
|----------------------------------|------|---------|--------------|
| Yangying Xu                      | 2022 | China   | Cohort       |
| Leili Safdarian                  | 2022 | Iran    | RCT          |
| Leila Nazari                     | 2022 | Iran    | RCT          |
| Mahvash Zargar                   | 2021 | Iran    | RCT          |
| Marzieh Zamaniyan                | 2020 | Iran    | RCT          |
| Ensieh S. Tehraninejad           | 2020 | Iran    | Cohort       |
| Majiyd Abdul Noushin             | 2021 | India   | Cohort       |
| Leila Nazari                     | 2019 | Iran    | RCT          |
| Sara Ershadi                     | 2022 | Iran    | RCT          |
| Marzieh Mehrafza                 | 2019 | Iran    | Cohort       |
