# Supplementary material for: Efficacy of Autologous Intrauterine Infusion of Platelet-Rich Plasma in Patients with Unexplained Repeated Implantation Failures in Embryo Transfer: A Systematic Review and Meta-Analysis
Source: MDPI journal article supplement (doi:10.3390/jcm11226753), 2022-11-15
Supplement: s1 [file s1]

**Table S2. Reasons of excluded studies**

| <b>Study</b>                            | <b>Excluded reasons</b>                |
|-----------------------------------------|----------------------------------------|
| Tina Tu-Thu Ngoc Nguyen 2022            | Animal experiments or cell experiments |
| Min Kyoung Kim 2022                     | Animal experiments or cell experiments |
| Ryan M Brown 2022                       | Animal experiments or cell experiments |
| Scarlet Babian 2022                     | Animal experiments or cell experiments |
| T. T. T. N. Nguyen 2022                 | Animal experiments or cell experiments |
| M. K. Kim 2021                          | Animal experiments or cell experiments |
| Konstantinos Sfakianoudis 2019          | Case reports                           |
| T. T. T. N. Nguyen 2019                 | Animal experiments or cell experiments |
| Natalia Juliana Nardelli Gonçalves 2020 | Animal experiments or cell experiments |
| Marzie Farimani 2017                    | Case reports                           |
| S. J. Russell 2022                      | Self pro-post study                    |
| Afsaneh Shah Bakhsh 2022                | Poor-quality study                     |
| Fateme Aghajanzadeh 2020                | Self pro-post study                    |
| Yih sien Enatsu 2021                    | Self pro-post study                    |
